# Supplementary material
Source: MDPI journal article supplement (https://www.mdpi.com/2076-0760/11/2/88)
Supplement: s1 [file s1]

## Supplemental Materials

**Table S1**

*Means and Correlations Among all Study Variables (N = 585).*

| Variable                           | M (SD)          | 1.   | 2.   | 3.   | 4.   | 5.   | 6.    | 7.    | 8.   | 9.   | 10.  | 11.   | 12.  | 13.  | 14.  | 15.  | 16.  | 17.   | 18.  | 19. | 20.  | 21. | 22. |
|------------------------------------|-----------------|------|------|------|------|------|-------|-------|------|------|------|-------|------|------|------|------|------|-------|------|-----|------|-----|-----|
| 1. Confidence                      | 3.16<br>(.69)   | 1    |      |      |      |      |       |       |      |      |      |       |      |      |      |      |      |       |      |     |      |     |     |
| 2. Skills                          | 2.80<br>(.69)   | .77  | 1    |      |      |      |       |       |      |      |      |       |      |      |      |      |      |       |      |     |      |     |     |
| 3. General Stress                  | 2.60<br>(.86)   | -.39 | -.44 | 1    |      |      |       |       |      |      |      |       |      |      |      |      |      |       |      |     |      |     |     |
| 4. Call to Action Stress           | 2.67<br>(.94)   | -.32 | -.37 | .87  | 1    |      |       |       |      |      |      |       |      |      |      |      |      |       |      |     |      |     |     |
| 5. Pride                           | 3.13<br>(1.07)  | .20  | .22  | .01  | .03  | 1    |       |       |      |      |      |       |      |      |      |      |      |       |      |     |      |     |     |
| 6. Bias                            | 2.83<br>(1.02)  | .21  | .22  | .06  | .08  | .78  | 1     |       |      |      |      |       |      |      |      |      |      |       |      |     |      |     |     |
| 7. Pluralism                       | 4.04<br>(.94)   | .36  | .32  | -.14 | -.13 | .40  | .32   | 1     |      |      |      |       |      |      |      |      |      |       |      |     |      |     |     |
| 8. Equality                        | 4.19<br>(.91)   | .34  | .31  | -.16 | -.14 | .26  | .17   | .75   | 1    |      |      |       |      |      |      |      |      |       |      |     |      |     |     |
| 9. Mistrust                        | 2.20<br>(1.18)  | -.07 | .004 | .19  | .15  | .39  | .45   | .02   | -.11 | 1    |      |       |      |      |      |      |      |       |      |     |      |     |     |
| 10. Minimization of Race           | 2.29<br>(1.33)  | .21  | -.13 | .25  | .15  | .02  | .05   | -.02  | -.12 | .51  | 1    |       |      |      |      |      |      |       |      |     |      |     |     |
| 11. Income                         | 4.06<br>(2.34)  | -.02 | -.03 | .03  | .01  | -.05 | -.09  | -.003 | .01  | -.06 | -.04 | 1     |      |      |      |      |      |       |      |     |      |     |     |
| 12. Education                      | 4.48<br>(1.55)  | .002 | .000 | -.03 | -.01 | .01  | -.04  | -.02  | -.04 | .08  | .03  | .59   | 1    |      |      |      |      |       |      |     |      |     |     |
| 13. Age                            | 44.46<br>(9.14) | .04  | .02  | -.10 | -.10 | .04  | -.004 | .04   | .004 | -.09 | -.19 | .21   | .15  | 1    |      |      |      |       |      |     |      |     |     |
| 14. Female Sex                     | 59.66%          | -.12 | -.01 | -.10 | -.05 | -.05 | -.05  | -.14  | -.13 | .12  | .12  | .32   | .18  | .12  | 1    |      |      |       |      |     |      |     |     |
| 15. US Born                        | 63.42%          | .20  | .18  | -.14 | -.04 | .13  | .15   | .07   | .10  | -.11 | -.11 | -.25  | -.27 | -.20 | -.06 | 1    |      |       |      |     |      |     |     |
| 16. Race                           | -               | -.13 | -.12 | .04  | .02  | -.16 | -.24  | -.02  | .02  | -.02 | .07  | .17   | .02  | -.07 | .18  | -.12 | 1    |       |      |     |      |     |     |
| 17. Child Age                      | 14.30<br>(2.48) | .07  | .10  | -.05 | -.01 | .03  | .10   | .03   | .004 | .01  | -.07 | -.05  | -.02 | .23  | -.03 | .03  | -.06 | 1     |      |     |      |     |     |
| 18. Child Female Sex               | 50.26%          | -.13 | -.13 | .12  | .07  | -.03 | .002  | -.06  | -.06 | .18  | .16  | .03   | .01  | .000 | .18  | -.06 | .13  | .03   | 1    |     |      |     |     |
| 19. Critical Reflection            | 4.17<br>(1.27)  | .13  | .10  | .09  | .11  | .22  | .34   | .14   | .10  | .09  | -.04 | -.04  | .01  | .002 | .11  | .19  | -.25 | -.02  | .02  | 1   |      |     |     |
| 20. Critical Motivation            | 4.76<br>(1.04)  | .38  | .34  | -.10 | -.05 | .35  | .31   | .44   | .38  | -.05 | -.24 | -.001 | .04  | .06  | -.10 | .19  | -.08 | -.001 | -.07 | .45 | 1    |     |     |
| 21. Critical Action                | 1.88<br>(1.15)  | -.08 | .03  | .17  | .11  | .22  | .28   | -.07  | -.16 | .43  | .41  | -.04  | .01  | -.10 | .11  | .01  | -.11 | -.003 | .18  | .14 | -.01 | 1   |     |
| 22. Lifetime Racial Discrimination | 2.57<br>(1.07)  | .08  | .05  | .11  | .13  | .25  | .38   | .04   | .04  | .22  | .13  | -.02  | .04  | -.08 | .02  | .17  | -.21 | -.002 | .03  | .34 | .21  | .30 | 1   |

*Note.* All values  $\geq .09$  are significant  $p < .05$ .

**Table S2***Unstandardized Means by Profile (N = 585).*

|                       | LPSLF           | PLSF            | PSF             |
|-----------------------|-----------------|-----------------|-----------------|
|                       | N = 285         | N = 204         | N = 96          |
| Variable              | <i>M (S.E.)</i> | <i>M (S.E.)</i> | <i>M (S.E.)</i> |
| Confidence            | 2.661 (.092)    | 3.696 (.029)    | 3.536 (.070)    |
| Skill                 | 2.282 (.057)    | 3.373 (.049)    | 3.129 (.144)    |
| General Stress        | 2.951 (.030)    | 1.672 (.057)    | 3.494 (.218)    |
| Call to Action Stress | 3.000 (.038)    | 1.713 (.063)    | 3.666 (.219)    |
| Pride Socialization   | 2.795 (.081)    | 3.293 (.090)    | 3.784 (.190)    |
| Prep for Bias         | 2.517 (.077)    | 2.923 (.082)    | 3.564 (.218)    |
| Socialization         |                 |                 |                 |
| Pluralism             | 3.621 (.104)    | 4.397 (.065)    | 4.518 (.085)    |
| Promotion of          | 3.840 (.100)    | 4.519 (.064)    | 4.554 (.073)    |
| Equality              |                 |                 |                 |
| Promotion of          | 2.184 (.077)    | 1.941 (.088)    | 2.776 (.240)    |
| Mistrust              |                 |                 |                 |
| Minimization of Race  | 2.462 (.082)    | 1.859 (.090)    | 2.692 (.227)    |
